# Supplementary material for: Structural diversity of lead halide chain compounds, APbX3, templated by isomeric molecular cations
Source: Royal Society of Chemistry journal article supplement (doi:10.1039/d0dt02782k), 2020-01-01
Supplement: d0dt02782k1.pdf [file d0dt02782k1.pdf]

# Structural Diversity of Lead Halide Chain Compounds, $\text{APbX}_3$ , Templated by Isomeric Molecular Cations

Yuan-Yuan Guo and Philip Lightfoot\*

School of Chemistry and EaStChem, University of St Andrews, St Andrews, KY16 9ST, UK;

E-Mail: [pl@st-andrews.ac.uk](mailto:pl@st-andrews.ac.uk) (PL)

## Supplementary Information

**Figure S1.** The full-range and expanded P-XRD data for  $\text{IQPbBr}_3$  at room temperature.

**Figure S2.** The full-range and expanded P-XRD data for  $\text{QPbBr}_3$  at room temperature.

**Figure S3.** The full-range and expanded P-XRD data for  $\text{QPbI}_3$  at room temperature.

**Figure S4.** The nature of the distortions within the inorganic  $\text{PbX}_6$  octahedra of the three compounds.

**Figure S5.** Thermal Gravimetric Analysis (TGA) of  $\text{IQPbBr}_3$ ,  $\text{QPbBr}_3$  and  $\text{QPbI}_3$ .

**Table S1.** Crystal and Structure Refinement Data for the three compounds at 173 K.

**Table S2.** Selected bond lengths (Å) and bond angles (°) for  $\text{IQPbBr}_3$  at 173 K and 298 K.

**Table S3.** Selected bond lengths (Å) and bond angles (°) for  $\text{QPbBr}_3$  at 173 K and 298 K.

**Table S4.** Selected bond lengths (Å) and bond angles (°) for  $\text{QPbI}_3$  at 173 K and 298 K.

**Table S5.** Hydrogen bond lengths (Å) and angles (°) for  $\text{IQPbBr}_3$ ,  $\text{QPbBr}_3$  and  $\text{QPbI}_3$  at 173 K.

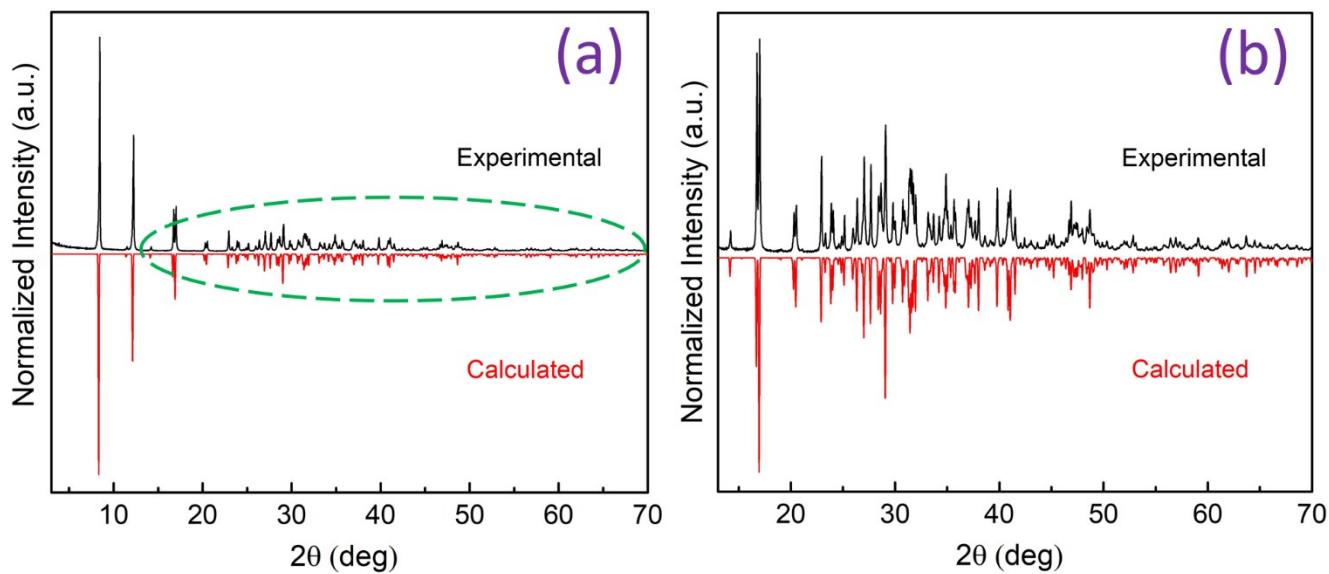

**Figure S1.** The full-range (a) and expanded (b) P-XRD data for IQPbBr<sub>3</sub> at room temperature, the corresponding colours represent the experimental (black) and the calculated (red) patterns.

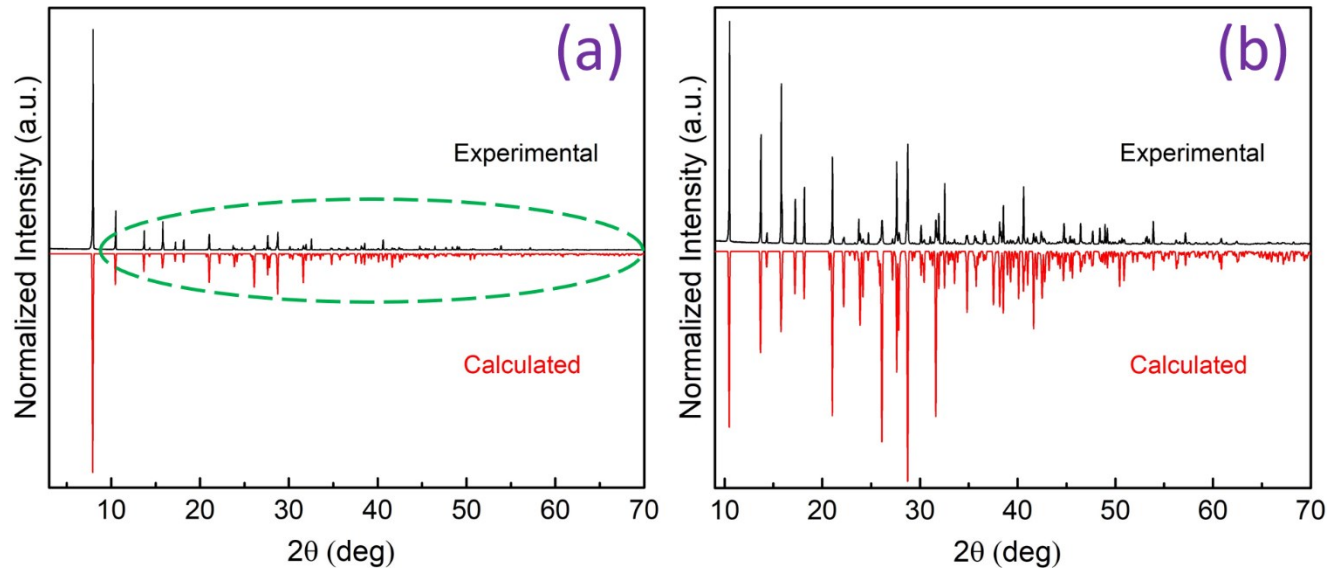

**Figure S2.** The full-range (a) and expanded (b) P-XRD data for QPbBr<sub>3</sub> at room temperature, the corresponding colours represent the experimental (black) and the calculated (red) patterns.

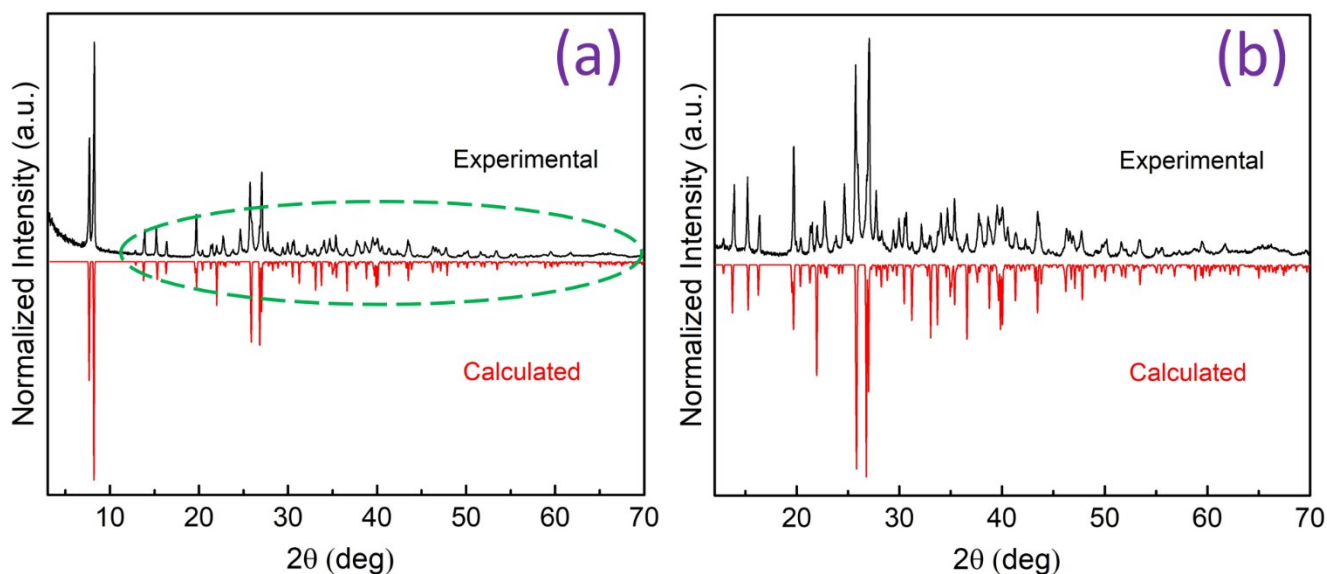

**Figure S3.** The full-range (a) and expanded (b) P-XRD data for QPbI<sub>3</sub> at room temperature, the corresponding colours represent the experimental (black) and the calculated (red) patterns.

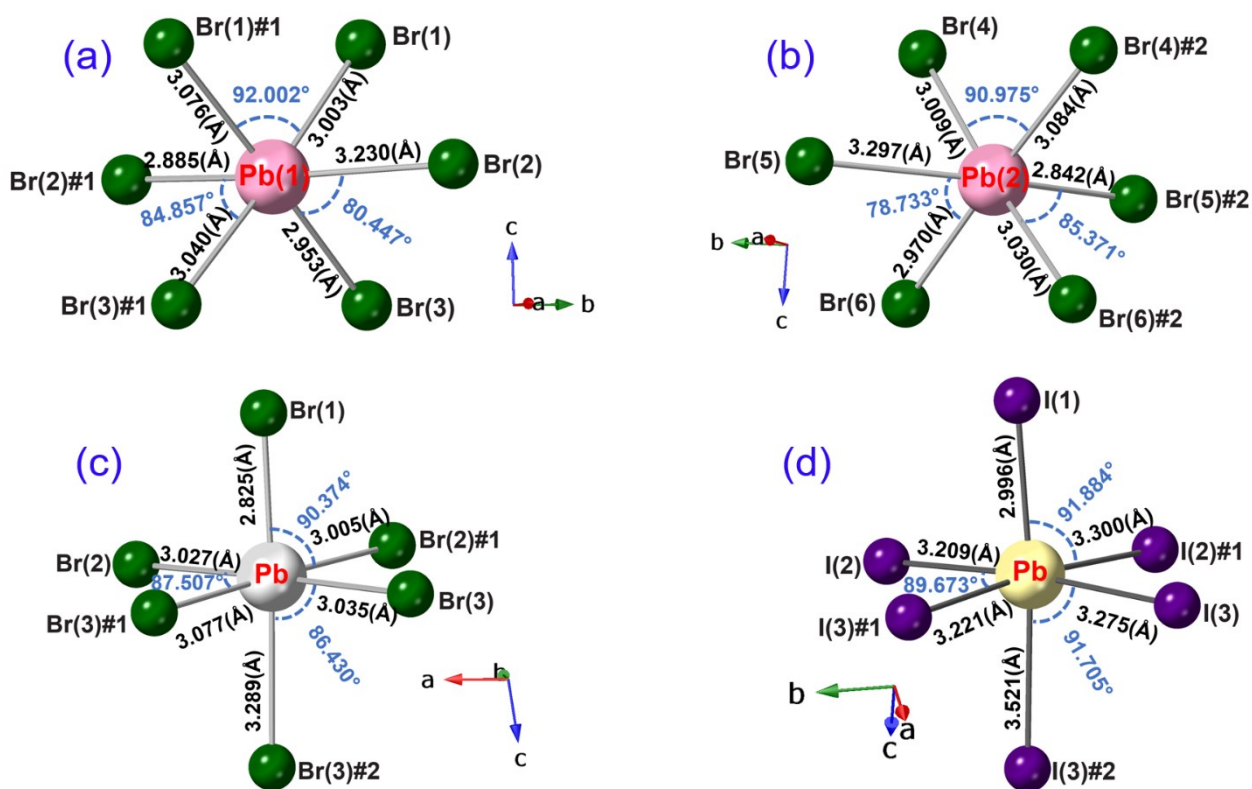

**Figure S4.** The nature of the distortions within the inorganic PbX<sub>6</sub> octahedra of the three compounds at 298 K. (a) Pb(1)Br<sub>6</sub> octahedra for IQPbBr<sub>3</sub>, (b) Pb(2)Br<sub>6</sub> octahedra for IQPbBr<sub>3</sub>, (c) PbBr<sub>6</sub> octahedra for QPbBr<sub>3</sub>, (d) PbI<sub>6</sub> octahedra for QPbI<sub>3</sub>.

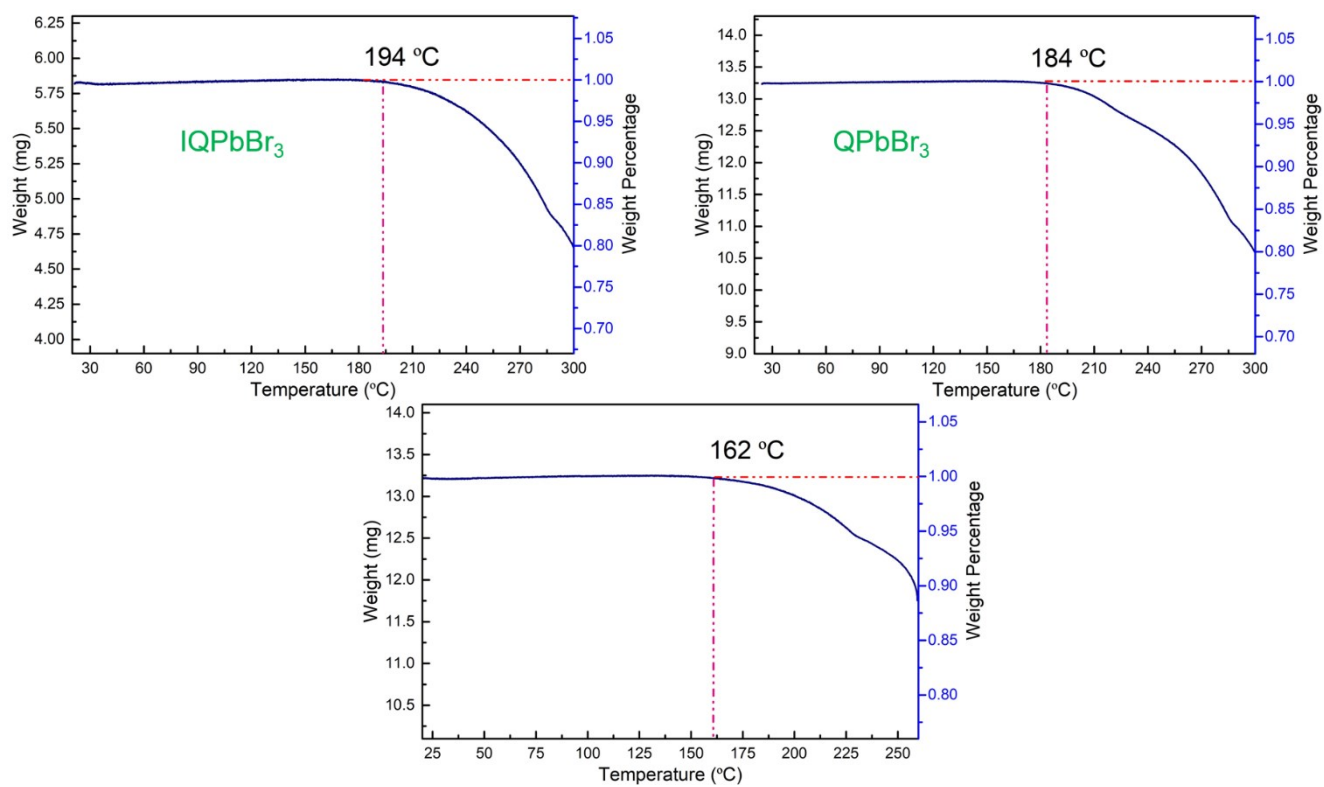

**Figure S5.** Thermal Gravimetric Analysis (TGA) of IQPbBr<sub>3</sub>, QPbBr<sub>3</sub> and QPbI<sub>3</sub>.

**Table S1.** Single crystal and structure refinement data for IQPbBr<sub>3</sub>, QPbBr<sub>3</sub> and QPbI<sub>3</sub> at 173 K.

|                                                            | <b>IQPbBr<sub>3</sub></b>                           | <b>QPbBr<sub>3</sub></b>                            | <b>QPbI<sub>3</sub></b>                             |
|------------------------------------------------------------|-----------------------------------------------------|-----------------------------------------------------|-----------------------------------------------------|
| <b>Formula</b>                                             | C <sub>9</sub> H <sub>8</sub> NPbBr <sub>3</sub>    | C <sub>9</sub> H <sub>8</sub> NPbBr <sub>3</sub>    | C <sub>9</sub> H <sub>8</sub> NPbI <sub>3</sub>     |
| <b>Formula weight</b>                                      | 577.08                                              | 577.08                                              | 718.05                                              |
| <b>Colour/Habit</b>                                        | Colorless/Chip                                      | Colorless/Prism                                     | Yellow/Prism                                        |
| <b>Crystal size (mm<sup>3</sup>)</b>                       | 0.32 × 0.24 × 0.09                                  | 0.25 × 0.06 × 0.04                                  | 0.32 × 0.09 × 0.05                                  |
| <b>Crystal system</b>                                      | Orthorhombic                                        | Monoclinic                                          | Monoclinic                                          |
| <b>Space group</b>                                         | <i>Pbca</i>                                         | <i>P2<sub>1</sub>/n</i>                             | <i>C2/c</i>                                         |
| <b><i>a</i> (Å)</b>                                        | 21.1904(15)                                         | 4.3397(2)                                           | 25.767(2)                                           |
| <b><i>b</i> (Å)</b>                                        | 7.7771(5)                                           | 22.5309(17)                                         | 4.6411(4)                                           |
| <b><i>c</i> (Å)</b>                                        | 30.828(2)                                           | 13.0048(10)                                         | 25.931(2)                                           |
| <b><math>\alpha</math> (°)</b>                             | 90                                                  | 90                                                  | 90                                                  |
| <b><math>\beta</math> (°)</b>                              | 90                                                  | 98.941(6)                                           | 115.396(7)                                          |
| <b><math>\gamma</math> (°)</b>                             | 90                                                  | 90                                                  | 90                                                  |
| <b><i>V</i> (Å<sup>3</sup>)</b>                            | 5080.5(6)                                           | 1256.12(15)                                         | 2801.3(4)                                           |
| <b><i>Z</i></b>                                            | 16                                                  | 4                                                   | 8                                                   |
| <b><math>\rho_{\text{calc}}</math> (g/cm<sup>3</sup>)</b>  | 3.018                                               | 3.052                                               | 3.405                                               |
| <b><math>\mu</math> (mm<sup>-1</sup>)</b>                  | 22.684                                              | 22.937                                              | 18.625                                              |
| <b>F(000)</b>                                              | 4096                                                | 1024                                                | 2480                                                |
| <b>Reflns collected</b>                                    | 47986                                               | 9972                                                | 12590                                               |
| <b>Independent reflns</b>                                  | 5808                                                | 2192                                                | 3132                                                |
|                                                            | 0.099                                               | 0.1118                                              | 0.086                                               |
| <b>Goodness of Fit</b>                                     | 1.072                                               | 0.944                                               | 0.909                                               |
| <b>Final <i>R</i> indices (<i>I</i> &gt; 2σ(<i>I</i>))</b> | R <sub>1</sub> = 0.0397<br>wR <sub>2</sub> = 0.0966 | R <sub>1</sub> = 0.0349<br>wR <sub>2</sub> = 0.0768 | R <sub>1</sub> = 0.0400<br>wR <sub>2</sub> = 0.0954 |
| <b>Largest diff. peak/hole (e Å<sup>-3</sup>)</b>          | 2.408/-2.586                                        | 1.955/-1.922                                        | 2.360/-1.679                                        |

**Table S2.** Selected bond lengths (Å) and bond angles (°) for IQPbBr<sub>3</sub> at 173 K and 298 K.

| Temperature           | 173 K     | 298 K      |
|-----------------------|-----------|------------|
| Pb(1)-Br(1)           | 2.9955(7) | 3.0034(11) |
| Pb(1)-Br(1)#1         | 3.0752(8) | 3.0763(11) |
| Pb(1)-Br(2)           | 3.2403(8) | 3.2299(12) |
| Pb(1)-Br(2)#1         | 2.8753(8) | 2.8846(12) |
| Pb(1)-Br(3)           | 2.9449(8) | 2.9535(11) |
| Pb(1)-Br(3)#1         | 3.0364(8) | 3.0398(11) |
| Pb(2)-Br(4)           | 3.0923(8) | 3.0837(11) |
| Pb(2)-Br(4)#2         | 2.9921(8) | 3.0088(11) |
| Pb(2)-Br(5)           | 2.8328(8) | 2.8425(11) |
| Pb(2)-Br(5)#2         | 3.3111(8) | 3.2973(12) |
| Pb(2)-Br(6)           | 3.0377(8) | 3.0295(11) |
| Pb(2)-Br(6)#2         | 2.9515(8) | 2.9704(11) |
| Br(2)#1-Pb(1)-Br(3)   | 95.50(2)  | 95.80(3)   |
| Br(2)#1-Pb(1)-Br(1)   | 93.95(2)  | 94.23(3)   |
| Br(3)-Pb(1)-Br(1)     | 88.38(2)  | 88.14(3)   |
| Br(2)#1-Pb(1)-Br(3)#1 | 84.87(2)  | 84.86(3)   |
| Br(3)-Pb(1)-Br(3)#1   | 94.52(3)  | 94.55(4)   |
| Br(2)#1-Pb(1)-Br(1)#1 | 82.36(2)  | 82.49(3)   |
| Br(1)-Pb(1)-Br(1)#1   | 91.78(2)  | 92.00(3)   |
| Br(3)#1-Pb(1)-Br(1)#1 | 85.30(2)  | 85.29(3)   |
| Br(3)-Pb(1)-Br(2)     | 80.21(2)  | 80.45(3)   |
| Br(1)-Pb(1)-Br(2)     | 77.81(2)  | 78.14(3)   |
| Br(3)#1-Pb(1)-Br(2)   | 103.56(2) | 102.93(3)  |
| Br(1)#1-Pb(1)-Br(2)   | 101.91(2) | 101.24(3)  |
| Br(5)-Pb(2)-Br(6)#2   | 92.21(2)  | 93.52(3)   |
| Br(5)-Pb(2)-Br(4)#2   | 94.04(2)  | 95.05(3)   |
| Br(6)#2-Pb(2)-Br(4)#2 | 88.90(2)  | 88.23(3)   |
| Br(5)-Pb(2)-Br(6)     | 85.20(2)  | 85.37(3)   |
| Br(6)#2-Pb(2)-Br(6)   | 94.89(3)  | 95.01(4)   |
| Br(5)-Pb(2)-Br(4)     | 84.15(2)  | 84.34(3)   |
| Br(4)#2-Pb(2)-Br(4)   | 90.64(2)  | 90.97(3)   |
| Br(6)-Pb(2)-Br(4)     | 85.53(2)  | 85.81(3)   |
| Br(6)#2-Pb(2)-Br(5)#2 | 78.60(2)  | 78.73(3)   |
| Br(4)#2-Pb(2)-Br(5)#2 | 78.02(2)  | 78.18(3)   |
| Br(6)-Pb(2)-Br(5)#2   | 103.33(2) | 101.83(3)  |
| Br(4)-Pb(2)-Br(5)#2   | 103.90(2) | 103.28(3)  |
| Pb(1)-Br(1)-Pb(1)#2   | 79.66(2)  | 79.53(3)   |
| Pb(2)-Br(4)-Pb(2)#1   | 79.43(2)  | 79.33(3)   |
| Pb(1)#2-Br(2)-Pb(1)   | 78.72(2)  | 78.77(3)   |
| Pb(2)-Br(5)-Pb(2)#1   | 78.11(2)  | 78.22(3)   |
| Pb(2)#1-Br(6)-Pb(2)   | 80.96(2)  | 80.81(3)   |
| Pb(1)-Br(3)-Pb(1)#2   | 81.09(2)  | 80.91(3)   |

Symmetry transformations used to generate equivalent atoms:

#1 -x+1/2,y+1/2,z #2 -x+1/2,y-1/2,z

**Table S3.** Selected bond lengths (Å) and bond angles (°) for QPbBr<sub>3</sub> at 173 K and 298 K.

| Temperature           | 173 K     | 298 K     |
|-----------------------|-----------|-----------|
| Pb(1)-Br(1)           | 2.8241(9) | 2.8247(6) |
| Pb(1)-Br(2)#1         | 2.9985(9) | 3.0046(6) |
| Pb(1)-Br(2)           | 3.0201(9) | 3.0267(6) |
| Pb(1)-Br(3)           | 3.0317(9) | 3.0352(6) |
| Pb(1)-Br(3)#1         | 3.2822(9) | 3.2890(6) |
| Pb(1)-Br(3)#2         | 3.0713(9) | 3.0766(6) |
| Br(1)-Pb(1)-Br(2)#1   | 90.42(3)  | 90.37(2)  |
| Br(1)-Pb(1)-Br(2)     | 88.91(3)  | 89.17(2)  |
| Br(2)-Pb(1)-Br(3)     | 87.04(2)  | 86.43(2)  |
| Br(2)#1-Pb(1)-Br(2)   | 92.28(2)  | 92.68(2)  |
| Br(1)-Pb(1)-Br(3)     | 91.97(3)  | 92.27(2)  |
| Br(2)#1-Pb(1)-Br(3)   | 89.10(2)  | 88.67(2)  |
| Br(1)-Pb(1)-Br(3)#2   | 90.47(3)  | 91.05(2)  |
| Br(2)#2-Pb(1)-Br(3)#1 | 92.06(3)  | 92.20(2)  |
| Br(2)-Pb(1)-Br(3)#2   | 87.97(2)  | 87.51(2)  |
| Br(3)-Pb(1)-Br(3)#1   | 92.07(2)  | 91.38(2)  |
| Br(3)#1-Pb(1)-Br(3)#2 | 87.12(2)  | 87.19(2)  |
| Br(3)-Pb(1)-Br(3)#2   | 90.64(2)  | 91.11(2)  |
| Pb(1)#2-Br(2)-Pb(1)   | 92.28(2)  | 92.68(2)  |
| Pb(1)#2-Br(3)-Pb(1)#1 | 92.88(2)  | 93.57(2)  |
| Pb(1)#2-Br(3)-Pb(1)   | 87.93(2)  | 88.62(2)  |
| Pb(1)-Br(3)-Pb(1)#1   | 90.64(2)  | 91.11(2)  |

Symmetry transformations used to generate equivalent atoms:

#1  $x-1, y, z$  #2  $x+1, y, z$

**Table S4.** Selected bond lengths (Å) and bond angles (°) for QPbI<sub>3</sub> at 173 K and 298 K.

| Temperature          | 173 K     | 298 K     |
|----------------------|-----------|-----------|
| Pb(1)-I(1)           | 3.0001(7) | 2.9956(6) |
| Pb(1)-I(2)           | 3.2051(6) | 3.2092(5) |
| Pb(1)-I(2)#1         | 3.2945(6) | 3.2996(5) |
| Pb(1)-I(3)           | 3.2174(6) | 3.2207(5) |
| Pb(1)-I(3)#1         | 3.2732(6) | 3.2749(5) |
| Pb(1)-I(3)#2         | 3.5061(6) | 3.5212(5) |
| I(1)-Pb(1)-I(2)      | 90.87(2)  | 91.19(1)  |
| I(1)-Pb(1)-I(3)      | 91.76(2)  | 92.40(1)  |
| I(2)-Pb(1)-I(3)      | 89.92(2)  | 89.67(1)  |
| I(1)-Pb(1)-I(3)#1    | 92.89(2)  | 93.08(1)  |
| I(3)-Pb(1)-I(3)#1    | 91.29(2)  | 91.53(1)  |
| I(1)-Pb(1)-I(2)#1    | 92.00(2)  | 91.88(1)  |
| I(2)-Pb(1)-I(2)#1    | 91.12(2)  | 91.28(1)  |
| I(3)#1-Pb(1)-I(2)#1  | 87.42(2)  | 87.20(1)  |
| I(2)-Pb(1)-I(3)#2    | 89.16(2)  | 89.13(1)  |
| I(3)-Pb(1)-I(3)#2    | 92.04(2)  | 91.71(1)  |
| I(3)#1-Pb(1)-I(3)#2  | 87.19(2)  | 86.69(1)  |
| I(2)#1-Pb(1)-I(3)#2  | 84.21(2)  | 84.04(1)  |
| Pb(1)-I(2)-Pb(1)#2   | 91.12(2)  | 91.28(1)  |
| Pb(1)-I(3)-Pb(1)#2   | 91.29(2)  | 91.53(1)  |
| Pb(1)-I(3)-Pb(1)#3   | 92.81(2)  | 93.31(1)  |
| Pb(1)#2-I(3)-Pb(1)#3 | 87.96(2)  | 88.29(1)  |

Symmetry transformations used to generate equivalent atoms:

#1  $x, y+1, z$  #2  $x, y-1, z$  #3  $x-1/2, -y+1/2, -z+1$



**Table S5.** Hydrogen bond lengths (Å) and angles (°) for IQPbBr<sub>3</sub>, QPbBr<sub>3</sub> and QPbI<sub>3</sub> at 173 K.

| <b>APbX<sub>3</sub></b>   | <b>D-H...A</b>      | <b>d(D-H)</b> | <b>d(H...A)</b> | <b>d(D...A)</b> | <b>&lt;(DHA)</b> |
|---------------------------|---------------------|---------------|-----------------|-----------------|------------------|
|                           | N(1)-H(2)...Br(1)   | 0.86          | 3.13            | 3.537(8)        | 111.8            |
|                           | N(1)-H(2)...Br(1)#1 | 0.86          | 3.08            | 3.694(9)        | 129.9            |
| <b>IQPbBr<sub>3</sub></b> | N(1)-H(2)...Br(6)#3 | 0.86          | 2.98            | 3.613(8)        | 132.3            |
|                           | N(2)-H(10)...Br(3)  | 0.86          | 3.10            | 3.413(8)        | 104.4            |
|                           | N(2)-H(10)...Br(4)  | 0.86          | 2.72            | 3.462(9)        | 145.5            |
| <b>QPbBr<sub>3</sub></b>  | N(1)-H(1)...Br(1)   | 0.86          | 2.50            | 3.324(8)        | 161.9            |
| <b>QPbI<sub>3</sub></b>   | N(1)-H(1)...I(1)    | 0.86          | 2.93            | 3.604(8)        | 136.5            |
|                           | N(1)-H(1)...I(1)#3  | 0.86          | 3.24            | 3.829(8)        | 128.0            |

Symmetry transformations used to generate equivalent atoms:

#1  $-x+1/2, y+1/2, z$  #3  $x, -y+1/2, z+1/2$  (**IQPbBr<sub>3</sub>**); #3  $-x+1, y, -z+3/2$  (**QPbI<sub>3</sub>**)
